# Supplementary material
Source: Research Square preprint supplement (doi:10.21203/rs.3.rs-9134047/v1)
Supplement: Supplementary file 1 [file 058418a885acafe3fd1fb45f.xlsx]

## Sheet: TK14_Klang_d18O
Depth(mm)	d18O/16O
610	-2.94
614	-2.94
618	-3.09
622	-3.59
626	-2.9
630	-2.98
634	-2.96
638	-3.16
642	-2.95
646	-3.23
650.5	-3.21
654	-3.26967
655	-3.30061
656	-3.05106
657	-3.25643
658	-2.85283
659	-3.19094
660	-2.63797
661	-2.45717
662	-2.89603
663	-2.8049
664	-1.86872
665	-1.4851
666	-2.38561
667	-2.13682
668	-2.23216
669	-3.05995
670	-2.81579
671	-2.47083
672	-2.58149
673	-2.7219
674	-2.50541
675	-2.37428
676	-2.338
677	-2.92152
678	-2.69944
679	-2.61313
680	-2.41184
681	-2.79747
682	-2.54131
683	-2.17963
684	-3.09468
685	-2.45797
686	-2.24428
687	-2.43263
688	-3.02182
689	-3.33384
690	-3.19683
691	-3.00262
692	-3.12276
693	-2.76441
694	-2.65818
695	-2.93359
696	-2.79588
697	-3.35001
698	-2.91742
699	-3.09703
700	-3.07947
701	-3.30341
702	-3.02226
703	-3.32584
704	-2.73142
705	-3.05179
706	-3.34706
707	-3.01196
708	-2.88722
709	-2.6958
710	-2.54878
711	-2.48842
712	-2.28929
713	-2.58632
714	-2.38543
715	-2.57714
716	-2.19815
717	-2.72881
718	-2.59913
719	-2.72722
720	-3.21379
721	-2.83587
722	-2.97373
723	-2.95001
724	-3.15919
725	-3.49378
726	-2.76798
727	-2.72845
728	-2.90901
729	-2.82639
730	-2.61518
731	-2.74078
732	-2.59756
733	-2.53908
734	-2.87282
735	-2.816
736	-3.14347
737	-3.22996
738	-2.69659
739	-2.47124
740	-2.57689
741	-2.68225
742	-2.44916
743	-3.0109
744	-2.29433
745	-2.6813
746	-2.96467
747	-2.55034
748	-2.96519
749	-2.65318
750	-2.50228
751	-2.49768
752	-2.55544
753	-3.11747
754	-2.65608
755	-2.80793
756	-2.5138
757	-3.06466
758	-2.40147
759	-2.93249
760	-2.50104
761	-2.5155
762	-2.98782
763	-2.46416
764	-2.26307
765	-2.43129
766	-2.58997
767	-2.2666
768	-2.54061
769	-2.21522
770	-2.29358
771	-2.25565
772	-2.13087
773	-2.55315
774	-1.98739
775	-2.31497
776	-1.85572
777	-2.00098
778	-1.93248
779	-2.09919
780	-2.27296
784	-2.48812
784.5	-2.62169
785	-2.38606
785.5	-2.71403
786	-2.31553
786.5	-2.83575
787	-2.48925
787.5	-2.58405
788	-2.71856
788.5	-2.70474
789	-2.27935
789.5	-2.36331
790	-2.3721
790.5	-2.1702
791	-2.27323
791.5	-2.7053
792	-2.75229
792.5	-2.56139
793	-2.69817
793.5	-2.80745
794	-2.56574
794.5	-2.39173
795	-2.36454
795.5	-2.4361
796	-2.50136
796.5	-2.3895
797	-2.91595
797.5	-2.35568
798	-2.28684
798.5	-2.34285
799	-2.18471
799.5	-2.32014
800.5	-2.09327
801	-2.102
801.5	-2.1999
802	-2.12395
802.5	-2.13058
803	-2.20968
803.5	-2.2439
804	-2.08763
804.5	-2.02606
805	-2.19961
805.5	-2.14437
806	-2.05026
806.5	-2.44622
807	-2.4122
807.5	-2.56837
808	-2.52817
808.5	-2.6986
809.5	-2.5493
810	-1.90883
811	-2.10037
811.5	-1.98572
812	-2.15301
812.5	-1.95121
813	-1.98977
813.5	-2.21671
814	-2.15969
815.5	-2.23231
816.5	-2.678
817	-2.39584
818.5	-2.26
819	-2.07136
819.5	-2.23
820	-1.96537
821	-2.17175
821.5	-2.32
822	-1.94902
822.5	-2.6
823.5	-2.39
825	-2.17009
825.5	-2.51
826	-2.53
826.5	-2.84
827	-2.52
827.5	-1.94535
828.5	-2.23
829	-1.67849
829.5	-2.14
830	-1.96076
831	-2.49
831.5	-2.27043
832	-2.41
832.5	-2.19
833	-2.19
833.5	-1.99994
834	-1.94
834.5	-1.78
835	-2.09
835.5	-2.03042
836	-1.85
836.5	-1.6
837	-1.82
837.5	-2.05799
838	-1.87
838.5	-2.26
839	-2.04
839.5	-2.01733
840	-2.16371
840.5	-1.65
841	-1.74
841.5	-1.88799
842	-1.94
842.5	-2.05
843	-1.88
843.5	-1.90134
844	-1.97
844.5	-1.83
845	-1.95
845.5	-1.81373
846	-1.58982
846.5	-1.58612
847	-1.76568
847.5	-1.95852
848	-1.83785
848.5	-1.87342
849	-2.02643
849.5	-2.0811
850	-1.82143
850.5	-2.19888
851	-1.89094
851.5	-1.82681
852	-1.8836
852.5	-1.90192
853	-1.85577
853.5	-2.04507
854	-1.91644
854.5	-1.87184
855	-2.0435
855.5	-2.1589
856	-1.91315
856.5	-2.05099
857	-1.97393
857.5	-2.11017
858	-2.0644
858.5	-2.18515
859	-2.18016
859.5	-2.24732
860	-2.02268
860.5	-2.18718
861	-2.0448
861.5	-2.14477
862	-1.92676
862.5	-2.00654
863	-2.00603
863.5	-1.97529
864	-2.16923
864.5	-2.26352
865	-2.06067
865.5	-2.18822
866	-2.06595
866.5	-1.73373
867	-1.58181
867.5	-1.6934
868	-1.79783
868.5	-1.61809
869	-1.63892
869.5	-1.6531
870	-1.92988
870.5	-1.65238
871	-1.61467
871.5	-1.78021
872	-1.95342
872.5	-1.80317
873	-1.77267
873.5	-2.01584
874	-1.73088
874.5	-1.86774
875	-1.98209
875.5	-1.35315
876	-1.48176
877	-1.78168
877.5	-2.11119
878	-1.75832
878.5	-1.77861
879	-1.6565
879.5	-1.61505
880	-1.29189
880.5	-1.48729
882	-1.51976
882.5	-1.59093
883	-1.90219
883.5	-1.87058
884	-1.85124
884.5	-1.74743
885	-1.35988
885.5	-1.84156
886	-1.70182
886.5	-1.64097
887	-1.28896
887.5	-1.52306
888	-1.49488
888.5	-1.51493
889	-1.69924
889.5	-1.55781
890	-1.5144
890.5	-1.96964
891	-2.15965
891.5	-1.73169
892	-1.72607
892.5	-1.72765
893	-1.83922
893.5	-1.89246
894	-1.42332
894.5	-1.34847
895	-1.37136
895.5	-1.61625
896	-1.70779
896.5	-1.79001
897	-1.81678
897.5	-1.76976
898	-1.96078
898.5	-1.84716
899	-1.83721
899.5	-1.48279
900	-1.328
900.5	-1.45602
901	-2.03922
901.5	-1.78338
902	-1.65817
902.5	-1.68947
903	-1.73896
903.5	-1.93099
904	-1.81499
904.5	-2.01233
905	-1.60807
905.5	-2.01858
906	-2.1711
906.5	-1.69127
907	-1.53428
907.5	-1.64239
908	-1.63152
908.5	-1.26603
909	-1.17124
909.5	-1.47348
910	-1.4591
910.5	-1.58527
911	-1.60366
911.5	-1.98465
912	-1.99064
912.5	-2.00808
913	-2.06656
913.5	-2.3426
914	-2.16292
914.5	-1.92265
915	-1.72173
915.5	-1.99155
916	-1.98001
916.5	-2.41476
917	-2.57232
917.5	-2.37139
918	-2.09217
918.5	-3.22035
919	-2.33928
919.5	-2.3376
920	-2.86562
920.5	-2.12116
921	-1.65
921.5	-2.10433
922	-2.16385
923	-2.36014
923.5	-2.41347
924	-2.33927
924.5	-2.15537
925	-2.0216
925.5	-2.5972
926	-2.23796
926.5	-2.41964
927	-2.59074
927.5	-2.71903
928	-2.37004
928.5	-2.76006
929	-2.66461
929.5	-2.79949
930	-2.72598
930.5	-2.65658
931	-2.91386
931.5	-2.70795
932	-2.05631
932.5	-1.87077
933	-1.99622
933.5	-1.96146
934	-1.90386
934.5	-2.1446
935	-2.13422
935.5	-2.13352
936	-1.99472
936.5	-2.92971
937	-2.60697
937.5	-2.69014
938	-3.02332
938.5	-2.46065
939	-2.34599
939.5	-2.46204
940	-2.27831
940.5	-2.49527
941	-2.17514
941.5	-2.43523
942	-2.53016
942.5	-2.79792
943	-2.59385
943.5	-2.56946
944	-2.5005
944.5	-2.87845
945	-2.6607
945.5	-2.61666
946	-2.72387
946.5	-2.69332
947	-2.38693
947.5	-2.33629
948	-1.79546
948.5	-2.26971
949	-2.00091
949.5	-2.06498
950	-2.15357
950.5	-2.55086
951	-2.66558
951.5	-2.55628
952	-2.1323
952.5	-2.51062
953	-1.96214
953.5	-2.01903
954	-1.85066
954.5	-2.05489
955	-1.92272
955.5	-2.41323
956	-2.21328
956.5	-2.61986
957	-2.31112
957.5	-2.41533
958	-2.41621
958.5	-2.93867
959	-2.13326
959.5	-2.36552
960	-2.51707
960.5	-2.60149
961	-2.50665
961.5	-2.77646
962	-3.03517
962.5	-2.54378
963	-2.63068
963.5	-2.50716
964	-2.88286
964.5	-2.62367
965	-2.95996
965.5	-2.75791
966	-2.71902
966.5	-2.83823
967	-2.69308
967.5	-2.85975
968	-2.85355
968.5	-2.69326
969	-2.9956
969.5	-2.44171
970	-2.44257
970.5	-2.74026
971	-2.38937
971.5	-2.74764
972	-2.42858
972.5	-2.96653
973	-2.78908
974	-2.22

## Sheet: TK14_Klang_U-Th_ages
Depth (mm)	Age (kyr BP)	Age uncertainty (kyr)
615	15.0099	0.0512596
635	15.1128	0.0660738
654	15.1931	0.0563914
655	15.1415	0.00843417
672	15.333	0.0158519
677	15.5091	0.0185286
810	15.6491	0.00861094
831	15.7245	0.00768004
836	15.7582	0.0145993
851	15.838	0.00825915
867	15.8941	0.00772175
880	15.9115	0.00704024
901	16.0168	0.00876997
910	16.0555	0.00826628
915	16.0859	0.00709027
918	16.1835	0.00864575
920	16.1993	0.00791857
921	16.2968	0.0135372
922	16.3256	0.00965471
929	16.3731	0.00672761
935	16.3648	0.0567227
943	16.433	0.0663179
951	16.5302	0.0614545
972.5	16.5561	0.0384108

## Sheet: TK14_Klang_5yr_interpol_d18O
Age (kyr BP)	d18O (permil)
15.0254	-3.09
15.046	-3.59
15.0665	-2.9
15.0871	-2.98
15.1077	-2.96
15.1255	-3.16
15.1415	-3.3006
15.1424	-2.95
15.1528	-3.0511
15.1593	-3.23
15.164	-3.2564
15.1753	-2.8528
15.1783	-3.21
15.1866	-3.1909
15.1931	-3.2697
15.1978	-2.638
15.2091	-2.4572
15.2203	-2.896
15.2316	-2.8049
15.2429	-1.8687
15.2541	-1.4851
15.2654	-2.3856
15.2767	-2.1368
15.2879	-2.2322
15.2992	-3.06
15.3105	-2.8158
15.3217	-2.4708
15.333	-2.5815
15.3682	-2.7219
15.4034	-2.5054
15.4386	-2.3743
15.4739	-2.338
15.5091	-2.9215
15.5101	-2.6994
15.5112	-2.6131
15.5122	-2.4118
15.5133	-2.7975
15.5143	-2.5413
15.5154	-2.1796
15.5165	-3.0947
15.5175	-2.458
15.5186	-2.2443
15.5196	-2.4326
15.5207	-3.0218
15.5217	-3.3338
15.5228	-3.1968
15.5238	-3.0026
15.5249	-3.1228
15.5259	-2.7644
15.527	-2.6582
15.528	-2.9336
15.5291	-2.7959
15.5301	-3.35
15.5312	-2.9174
15.5322	-3.097
15.5333	-3.0795
15.5343	-3.3034
15.5354	-3.0223
15.5364	-3.3258
15.5375	-2.7314
15.5386	-3.0518
15.5396	-3.3471
15.5407	-3.012
15.5417	-2.8872
15.5428	-2.6958
15.5438	-2.5488
15.5449	-2.4884
15.5459	-2.2893
15.547	-2.5863
15.548	-2.3854
15.5491	-2.5771
15.5501	-2.1982
15.5512	-2.7288
15.5522	-2.5991
15.5533	-2.7272
15.5543	-3.2138
15.5554	-2.8359
15.5564	-2.9737
15.5575	-2.95
15.5585	-3.1592
15.5596	-3.4938
15.5607	-2.768
15.5617	-2.7284
15.5628	-2.909
15.5638	-2.8264
15.5649	-2.6152
15.5659	-2.7408
15.567	-2.5976
15.568	-2.5391
15.5691	-2.8728
15.5701	-2.816
15.5712	-3.1435
15.5722	-3.23
15.5733	-2.6966
15.5743	-2.4712
15.5754	-2.5769
15.5764	-2.6823
15.5775	-2.4492
15.5785	-3.0109
15.5796	-2.2943
15.5806	-2.6813
15.5817	-2.9647
15.5828	-2.5503
15.5838	-2.9652
15.5849	-2.6532
15.5859	-2.5023
15.587	-2.4977
15.588	-2.5554
15.5891	-3.1175
15.5901	-2.6561
15.5912	-2.8079
15.5922	-2.5138
15.5933	-3.0647
15.5943	-2.4015
15.5954	-2.9325
15.5964	-2.501
15.5975	-2.5155
15.5985	-2.9878
15.5996	-2.4642
15.6006	-2.2631
15.6017	-2.4313
15.6027	-2.59
15.6038	-2.2666
15.6049	-2.5406
15.6059	-2.2152
15.607	-2.2936
15.608	-2.2557
15.6091	-2.1309
15.6101	-2.5531
15.6112	-1.9874
15.6122	-2.315
15.6133	-1.8557
15.6143	-2.001
15.6154	-1.9325
15.6164	-2.0992
15.6175	-2.273
15.6217	-2.4881
15.6222	-2.6217
15.6227	-2.3861
15.6233	-2.714
15.6238	-2.3155
15.6243	-2.8358
15.6248	-2.4892
15.6254	-2.5841
15.6259	-2.7186
15.6264	-2.7047
15.627	-2.2793
15.6275	-2.3633
15.628	-2.3721
15.6285	-2.1702
15.6291	-2.2732
15.6296	-2.7053
15.6301	-2.7523
15.6306	-2.5614
15.6312	-2.6982
15.6317	-2.8075
15.6322	-2.5657
15.6327	-2.3917
15.6333	-2.3645
15.6338	-2.4361
15.6343	-2.5014
15.6348	-2.3895
15.6354	-2.9159
15.6359	-2.3557
15.6364	-2.2868
15.637	-2.3429
15.6375	-2.1847
15.638	-2.3201
15.6391	-2.0933
15.6396	-2.102
15.6401	-2.1999
15.6406	-2.1239
15.6412	-2.1306
15.6417	-2.2097
15.6422	-2.2439
15.6427	-2.0876
15.6433	-2.0261
15.6438	-2.1996
15.6443	-2.1444
15.6448	-2.0503
15.6454	-2.4462
15.6459	-2.4122
15.6464	-2.5684
15.6469	-2.5282
15.6475	-2.6986
15.6485	-2.5493
15.6491	-1.9088
15.6526	-2.1004
15.6544	-1.9857
15.6562	-2.153
15.658	-1.9512
15.6598	-1.9898
15.6616	-2.2167
15.6634	-2.1597
15.6688	-2.2323
15.6724	-2.678
15.6742	-2.3958
15.6796	-2.26
15.6814	-2.0714
15.6832	-2.23
15.685	-1.9654
15.6886	-2.1717
15.6904	-2.32
15.6922	-1.949
15.694	-2.6
15.6976	-2.39
15.703	-2.1701
15.7048	-2.51
15.7066	-2.53
15.7084	-2.84
15.7102	-2.52
15.712	-1.9454
15.7156	-2.23
15.7174	-1.6785
15.7191	-2.14
15.7209	-1.9608
15.7245	-2.49
15.7279	-2.2704
15.7313	-2.41
15.7346	-2.19
15.738	-2.19
15.7414	-1.9999
15.7447	-1.94
15.7481	-1.78
15.7515	-2.09
15.7548	-2.0304
15.7582	-1.85
15.7609	-1.6
15.7635	-1.82
15.7662	-2.058
15.7688	-1.87
15.7715	-2.26
15.7742	-2.04
15.7768	-2.0173
15.7795	-2.1637
15.7821	-1.65
15.7848	-1.74
15.7875	-1.888
15.7901	-1.94
15.7928	-2.05
15.7954	-1.88
15.7981	-1.9013
15.8008	-1.97
15.8034	-1.83
15.8061	-1.95
15.8087	-1.8137
15.8114	-1.5898
15.814	-1.5861
15.8167	-1.7657
15.8194	-1.9585
15.822	-1.8379
15.8247	-1.8734
15.8273	-2.0264
15.83	-2.0811
15.8327	-1.8214
15.8353	-2.1989
15.838	-1.8909
15.8397	-1.8268
15.8415	-1.8836
15.8432	-1.9019
15.845	-1.8558
15.8467	-2.0451
15.8485	-1.9164
15.8503	-1.8718
15.852	-2.0435
15.8538	-2.1589
15.8555	-1.9132
15.8573	-2.051
15.859	-1.9739
15.8608	-2.1102
15.8625	-2.0644
15.8643	-2.1851
15.8661	-2.1802
15.8678	-2.2473
15.8696	-2.0227
15.8713	-2.1872
15.8731	-2.0448
15.8748	-2.1448
15.8766	-1.9268
15.8783	-2.0065
15.8801	-2.006
15.8818	-1.9753
15.8836	-2.1692
15.8854	-2.2635
15.8871	-2.0607
15.8889	-2.1882
15.8906	-2.066
15.8924	-1.7337
15.8941	-1.5818
15.8948	-1.6934
15.8955	-1.7978
15.8961	-1.6181
15.8968	-1.6389
15.8975	-1.6531
15.8981	-1.9299
15.8988	-1.6524
15.8995	-1.6147
15.9001	-1.7802
15.9008	-1.9534
15.9015	-1.8032
15.9022	-1.7727
15.9028	-2.0158
15.9035	-1.7309
15.9042	-1.8677
15.9048	-1.9821
15.9055	-1.3532
15.9062	-1.4818
15.9075	-1.7817
15.9082	-2.1112
15.9088	-1.7583
15.9095	-1.7786
15.9102	-1.6565
15.9108	-1.6151
15.9115	-1.2919
15.914	-1.4873
15.9215	-1.5198
15.924	-1.5909
15.9266	-1.9022
15.9291	-1.8706
15.9316	-1.8512
15.9341	-1.7474
15.9366	-1.3599
15.9391	-1.8416
15.9416	-1.7018
15.9441	-1.641
15.9466	-1.289
15.9491	-1.5231
15.9516	-1.4949
15.9541	-1.5149
15.9566	-1.6992
15.9591	-1.5578
15.9616	-1.5144
15.9642	-1.9696
15.9667	-2.1596
15.9692	-1.7317
15.9717	-1.7261
15.9742	-1.7276
15.9767	-1.8392
15.9792	-1.8925
15.9817	-1.4233
15.9842	-1.3485
15.9867	-1.3714
15.9892	-1.6162
15.9917	-1.7078
15.9942	-1.79
15.9967	-1.8168
15.9992	-1.7698
16.0018	-1.9608
16.0043	-1.8472
16.0068	-1.8372
16.0093	-1.4828
16.0118	-1.328
16.0143	-1.456
16.0168	-2.0392
16.0189	-1.7834
16.0211	-1.6582
16.0232	-1.6895
16.0254	-1.739
16.0276	-1.931
16.0297	-1.815
16.0319	-2.0123
16.034	-1.6081
16.0362	-2.0186
16.0383	-2.1711
16.0405	-1.6913
16.0426	-1.5343
16.0448	-1.6424
16.0469	-1.6315
16.0491	-1.266
16.0512	-1.1712
16.0534	-1.4735
16.0555	-1.4591
16.0586	-1.5853
16.0616	-1.6037
16.0646	-1.9847
16.0677	-1.9906
16.0707	-2.0081
16.0738	-2.0666
16.0768	-2.3426
16.0798	-2.1629
16.0829	-1.9226
16.0859	-1.7217
16.1022	-1.9915
16.1184	-1.98
16.1347	-2.4148
16.1509	-2.5723
16.1672	-2.3714
16.1835	-2.0922
16.1874	-3.2203
16.1914	-2.3393
16.1953	-2.3376
16.1993	-2.8656
16.248	-2.1212
16.2968	-1.65
16.3112	-2.1043
16.3256	-2.1639
16.3324	-2.3601
16.3358	-2.4135
16.3391	-2.3393
16.3425	-2.1554
16.3459	-2.0216
16.3493	-2.5972
16.3527	-2.238
16.3561	-2.4196
16.3595	-2.5907
16.3629	-2.719
16.3648	-2.1342
16.3655	-2.1446
16.3662	-1.9039
16.3663	-2.37
16.3669	-1.9615
16.3676	-1.9962
16.3683	-1.8708
16.369	-2.0563
16.3691	-2.1335
16.3697	-2.708
16.3697	-2.7601
16.3704	-2.9139
16.371	-2.6566
16.3717	-2.726
16.3724	-2.7995
16.3731	-2.6646
16.3733	-1.9947
16.3776	-2.9297
16.3818	-2.607
16.3861	-2.6901
16.3904	-3.0233
16.3946	-2.4606
16.3989	-2.346
16.4032	-2.462
16.4074	-2.2783
16.4117	-2.4953
16.4159	-2.1751
16.4202	-2.4352
16.4245	-2.5302
16.4287	-2.7979
16.433	-2.5938
16.4391	-2.5695
16.4451	-2.5005
16.4512	-2.8785
16.4573	-2.6607
16.4634	-2.6167
16.4695	-2.7239
16.4755	-2.6933
16.4816	-2.3869
16.4877	-2.3363
16.4938	-1.7955
16.4999	-2.2697
16.5059	-2.0009
16.512	-2.065
16.5181	-2.1536
16.5242	-2.5509
16.5302	-2.6656
16.5308	-2.5563
16.5314	-2.1323
16.532	-2.5106
16.5327	-1.9621
16.5333	-2.019
16.5339	-1.8507
16.5345	-2.0549
16.5351	-1.9227
16.5357	-2.4132
16.5363	-2.2133
16.5369	-2.6199
16.5375	-2.3111
16.5381	-2.4153
16.5387	-2.4162
16.5393	-2.9387
16.5399	-2.1333
16.5405	-2.3655
16.5411	-2.5171
16.5417	-2.6015
16.5423	-2.5066
16.5429	-2.7765
16.5435	-3.0352
16.5441	-2.5438
16.5447	-2.6307
16.5453	-2.5072
16.5459	-2.8829
16.5465	-2.6237
16.5471	-2.96
16.5477	-2.7579
16.5483	-2.719
16.5489	-2.8382
16.5495	-2.6931
16.5501	-2.8598
16.5507	-2.8536
16.5513	-2.6933
16.5519	-2.9956
16.5525	-2.4417
16.5531	-2.4426
16.5537	-2.7403
16.5543	-2.3894
16.5549	-2.7476
16.5555	-2.4286
16.5561	-2.9665
