# Supplementary material
Source: Research Square preprint supplement (doi:10.21203/rs.3.rs-9134047/v1)
Supplement: Supplementary file 2 [file a8019642b216d953165a89f3.xlsx]

## Sheet: Introduction
This spreadsheet includes the simulated temperature, precipitation and d18O-speleo anomalies (relative to start year of model simulation, 16.2 ka) for major cave sites discussed in this study.
"Abrupt global climate disruptions 16,100 years ago due to catastrophic Barents ice dam collapse" by Sinha, Timmermann et al, 2026
We conducted freshwater forcing experiments using the isotope-enabled Community Earth System Model (iCESM) version 1.2.2. iCESM is developed by adding a water-isotope component to the Community Earth System Model (CESM). In iCESM, the ocean model, Parallel Ocean Program version 2 (POP2), is coupled with the atmospheric model, Community Atmosphere Model version 5 (CAM5). POP2 provides approximatel…
The data tabs include the data from Figure 4 and Figure S3

## Sheet: TS_PRECT_d18O_Furong
Model Year (start time at 16.2 ka)		Surface Temperature anomaly relative to 16.2 ka (Celsius)		Total Precipitation anomaly relative to 16.2 ka (m/year)		d18O speleo anomaly (based on precipitation and temperature) (permil) relative to 16.2 ka
16.195		0		0		0
16.19		0.384		-0.1063		-0.8004
16.185		0.319		0.1038		-1.2666
16.18		0.023		0.0544		-1.0594
16.175		0.44		0.0602		-0.7174
16.17		0.617		-0.071		-1.1762
16.165		0.306		0.0369		-1.2535
16.16		0.933		-0.2728		-0.6454
16.155		0.252		-0.1747		0.1744
16.15		0.124		-0.0921		-0.2905
16.145		0.41		-0.2045		-0.4047
16.14		-0.04		-0.0929		-0.4537
16.135		0.179		0.0191		-0.7188
16.13		-0.041		0.0079		-1.2266
16.125		-0.027		-0.0653		-0.5745
16.12		0.324		0.0492		-0.525
16.115		0.294		-0.006		-1.1398
16.11		0.596		-0.063		-0.664
16.105		-0.019		-0.0402		-1.0365
16.1		0.613		-0.1636		-0.3083
16.095		0.173		-0.0844		-0.781
16.09		0.141		-0.1042		-0.7904
16.085		-0.157		-0.0675		-0.8078
16.08		-0.474		0.0857		-0.9023
16.075		-0.535		0.0108		-0.9199
16.07		-0.875		0.0715		0.393
16.065		-1.092		-0.0761		0.117
16.06		-0.954		-0.1242		-0.3322
16.055		-1.424		0.1221		-0.0333
16.05		-1.575		-0.0214		0.2893
16.045		-1.767		0.0358		0.1653
16.04		-1.965		0.0508		0.1629
16.035		-1.617		-0.0136		0.2998
16.03		-1.884		-0.1223		0.5469
16.025		-1.888		0.0137		-0.0314
16.02		-1.616		-0.0076		0.6538
16.015		-2.185		-0.0163		0.7689
16.01		-1.629		0.0122		0.607
16.005		-2.075		0.0057		0.9369
16		-1.909		-0.1953		0.9034
15.995		-2.043		0.0587		-0.1533
15.99		-1.964		0.0394		-0.3034
15.985		-2.054		-0.0908		1.2027
15.98		-2.076		-0.0177		1.0619
15.975		-2.38		-0.0375		0.8492
15.97		-2.125		-0.0487		0.3477
15.965		-1.903		-0.114		0.6478
15.96		-1.88		0.0888		0.5919
15.955		-2.377		-0.103		1.2326
15.95		-2.108		-0.0531		0.7447
15.945		-1.861		0.0131		0.6303
15.94		-2.262		0.0457		0.7158
15.935		-1.839		-0.0916		0.4451
15.93		-1.308		0.0021		0.5948
15.925		-2.194		-0.0546		-0.2336
15.92		-2.492		0.0279		0.6569
15.915		-1.947		0.0239		-0.3906
15.91		-1.966		0.0923		0.4395
15.905		-1.926		0.0493		0.1395
15.9		-2.191		-0.048		1.1453
15.895		-2.054		0.0017		0.8038
15.89		-1.597		-0.0395		0.4663
15.885		-1.069		-0.0175		0.6029
15.88		-1.135		0.0662		0.1032
15.875		-1.371		-0.0572		-0.2065
15.87		-0.868		-0.023		-0.3064
15.865		-0.879		-0.1887		0.4558
15.86		-0.881		0.0737		0.2305
15.855		-1.307		-0.0055		-0.4954
15.85		-1.073		0.1251		-0.3833
15.845		-0.588		-0.0589		-0.4066
15.84		-0.357		-0.133		0.2059
15.835		-0.669		-0.0399		-0.4946
15.83		-0.595		-0.0344		-0.6422
15.825		-0.498		-0.0205		-0.0142
15.82		-0.285		-0.181		-0.0582
15.815		-0.555		0.0029		-0.3476
15.81		-0.366		-0.0719		0.1403
15.805		-0.224		0.1151		0.2005
15.8		-0.431		-0.0547		-0.4668

## Sheet: TS_PRECT_d18O_Klang
Model Year (start time at 16.2 ka)		Surface Temperature anomaly relative to 16.2 ka (Celsius)		Total Precipitation anomaly relative to 16.2 ka (m/year)		d18O speleo anomaly (based on precipitation and temperature) (permil) relative to 16.2 ka
16.195		0		0		0
16.19		0.07		0.2418		-0.1963
16.185		0.055		0.3526		-0.4565
16.18		0.07		0.2238		-0.4539
16.175		0.087		0.2243		-0.4907
16.17		0.222		0.4374		-0.8043
16.165		0.09		0.2013		-0.431
16.16		0.009		0.2138		-0.0714
16.155		0.061		-0.0292		0.4371
16.15		-0.018		0.3783		-0.0785
16.145		-0.011		0.2633		-0.4221
16.14		-0.238		0.1299		-0.2467
16.135		0.01		0.0919		-0.039
16.13		-0.071		0.2783		-0.4567
16.125		-0.044		0.4056		-0.7743
16.12		0.08		0.1221		0.3365
16.115		0.126		0.2075		-0.6113
16.11		-0.04		0.2685		-0.6827
16.105		0.289		0.1694		-0.3898
16.1		-0.032		0.3233		-0.61
16.095		0.141		0.4294		-1.1911
16.09		0.232		0.1347		-0.2381
16.085		-0.225		0.2753		-0.7739
16.08		-0.118		0.1637		-0.3453
16.075		-0.092		0.0877		-0.3127
16.07		-0.294		0.0574		0.2808
16.065		-0.306		0.1034		0.1585
16.06		-0.522		-0.0049		0.1257
16.055		-0.636		-0.1192		0.5529
16.05		-0.454		0.0429		0.0752
16.045		-0.713		-0.0351		0.3506
16.04		-0.893		-0.0696		0.0422
16.035		-0.603		-0.1681		0.3901
16.03		-0.748		0.0809		0.1727
16.025		-0.723		-0.0951		0.2994
16.02		-0.394		-0.188		0.943
16.015		-0.895		-0.0204		0.4129
16.01		-0.78		-0.2742		0.7016
16.005		-0.961		-0.3732		0.7788
16		-0.862		-0.0961		0.5387
15.995		-0.431		0.0242		0.1765
15.99		-0.762		-0.022		0.1396
15.985		-0.809		-0.2433		0.9732
15.98		-0.574		-0.2531		0.7827
15.975		-0.778		-0.1179		0.3199
15.97		-0.677		-0.2016		0.7126
15.965		-0.51		0.2138		0.0768
15.96		-0.528		-0.127		0.5721
15.955		-0.715		-0.2759		0.7962
15.95		-0.718		-0.0588		0.3707
15.945		-0.773		-0.1401		0.6124
15.94		-0.509		0.2336		0.0639
15.935		-0.732		0.0279		0.1774
15.93		-0.475		-0.2291		0.5617
15.925		-0.709		0.1253		0.0312
15.92		-0.805		-0.2837		0.7535
15.915		-0.615		0.0771		-0.1551
15.91		-0.769		-0.2787		0.7306
15.905		-0.671		0.0168		0.366
15.9		-0.722		-0.0561		0.4251
15.895		-0.714		-0.1186		0.6554
15.89		-0.653		-0.228		0.7639
15.885		-0.646		-0.1965		0.6925
15.88		-0.334		0.1667		-0.3438
15.875		-0.191		0.1279		-0.0027
15.87		-0.148		0.118		-0.4012
15.865		-0.187		0.1112		-0.238
15.86		-0.522		-0.1436		0.3425
15.855		-0.335		0.2245		-0.0966
15.85		-0.128		0.2184		-0.483
15.845		-0.123		0.0215		-0.3417
15.84		-0.4		-0.0697		0.2735
15.835		-0.169		0.0998		0.0012
15.83		-0.197		0.086		-0.286
15.825		0.018		0.059		-0.3398
15.82		-0.125		0.0438		-0.0581
15.815		-0.166		0.2212		-0.2645
15.81		-0.067		-0.0147		0.1938
15.805		-0.044		0.1017		0.1003
15.8		0.08		0.277		-0.5371

## Sheet: TS_PRECT_d18O_Haozhu
Model Year (start time at 16.2 ka)		Surface Temperature anomaly relative to 16.2 ka (Celsius)		Total Precipitation anomaly relative to 16.2 ka (m/year)		d18O speleo anomaly (based on precipitation and temperature) (permil) relative to 16.2 ka
16.195		0		0		0
16.19		0.176		-0.0865		-0.512
16.185		0.35		0.1372		-1.1477
16.18		-0.028		-0.0037		-0.8383
16.175		0.292		0.0335		-0.5132
16.17		0.472		-0.1129		-0.9268
16.165		0.193		-0.0024		-0.9311
16.16		0.702		-0.2615		-0.3615
16.155		0.073		-0.1044		0.2005
16.15		0.033		-0.1265		-0.224
16.145		0.328		-0.2417		-0.0598
16.14		-0.157		-0.0174		-0.3544
16.135		-0.044		-0.0242		-0.6336
16.13		-0.115		-0.0228		-0.8773
16.125		-0.039		-0.1381		-0.3143
16.12		0.221		-0.0162		-0.1943
16.115		0.353		0.0062		-0.7827
16.11		0.544		-0.0636		-0.494
16.105		-0.094		0.0639		-0.9016
16.1		0.378		-0.1524		-0.2454
16.095		-0.075		-0.1021		-0.4544
16.09		0.007		-0.1671		-0.2684
16.085		-0.413		-0.0955		-0.3977
16.08		-0.563		0.0097		-0.4664
16.075		-0.617		-0.0517		-0.3502
16.07		-1.137		0.0806		0.613
16.065		-1.254		-0.1002		0.2885
16.06		-1.41		-0.13		-0.0323
16.055		-1.661		0.0697		0.0563
16.05		-1.983		-0.0335		0.6281
16.045		-2.027		0.0185		0.4394
16.04		-2.219		0.0311		0.3184
16.035		-1.885		-0.054		0.4324
16.03		-2.212		-0.1604		0.481
16.025		-2.195		0.09		0.2354
16.02		-1.909		0.0283		0.6444
16.015		-2.6		-0.0406		0.7172
16.01		-2.041		-0.0948		0.7404
16.005		-2.541		-0.0017		1.1201
16		-2.377		-0.0664		1.0043
15.995		-2.274		0.0312		-0.0029
15.99		-2.167		-0.1184		0.0661
15.985		-2.609		-0.0513		1.2081
15.98		-2.366		-0.1052		1.1532
15.975		-2.638		-0.0782		1.0237
15.97		-2.521		-0.049		0.6126
15.965		-2.278		-0.0711		0.6889
15.96		-2.195		0.0314		0.9055
15.955		-2.791		-0.0252		1.2665
15.95		-2.465		-0.0274		0.9726
15.945		-2.262		-0.0386		0.8544
15.94		-2.706		0.0459		0.7286
15.935		-2.271		-0.0125		0.4924
15.93		-1.636		0.0707		0.8994
15.925		-2.634		0.0016		0.1651
15.92		-2.769		-0.052		0.9448
15.915		-2.189		0.0279		-0.2094
15.91		-2.452		0.0634		0.4494
15.905		-2.31		0.0876		0.3565
15.9		-2.656		-0.0117		1.2144
15.895		-2.367		0.0166		1.0245
15.89		-1.891		-0.0305		0.8044
15.885		-1.445		-0.0315		0.5051
15.88		-1.453		0.1438		0.1712
15.875		-1.6		-0.0591		-0.0193
15.87		-1.181		0.0579		-0.2168
15.865		-1.361		-0.1292		0.5383
15.86		-1.058		-0.032		0.3262
15.855		-1.635		-0.0111		0.0367
15.85		-1.381		0.2244		-0.3441
15.845		-0.871		-0.092		-0.1372
15.84		-0.517		-0.0231		0.3513
15.835		-0.779		-0.1048		-0.1747
15.83		-0.855		0.0777		-0.6167
15.825		-0.682		0.1145		-0.0749
15.82		-0.51		-0.1394		0.2486
15.815		-0.744		0.0144		-0.1576
15.81		-0.562		-0.0306		0.236
15.805		-0.493		0.042		0.469
15.8		-0.566		-0.1526		-0.3653

## Sheet: TS_PRECT__d18O_Hulu
Model Year (start time at 16.2 ka)		Surface Temperature anomaly relative to 16.2 ka (Celsius)		Total Precipitation anomaly relative to 16.2 ka (m/year)		d18O speleo anomaly (based on precipitation and temperature) (permil) relative to 16.2 ka
16.195		0		0		0
16.19		0.307		0.0283		0.174
16.185		0.704		0.0381		-0.3845
16.18		0.073		-0.0727		-0.2069
16.175		0.277		0.1056		-0.1558
16.17		0.6		-0.063		-0.0864
16.165		0.237		0.0326		-0.3295
16.16		0.651		-0.1141		0.0631
16.155		-0.049		-0.0303		0.7967
16.15		0.126		0.0068		0.4171
16.145		0.329		-0.1348		0.3782
16.14		-0.09		-0.128		0.2527
16.135		-0.11		-0.1094		-0.3244
16.13		0.024		0.0517		-0.1237
16.125		0.281		-0.1057		-0.103
16.12		0.264		-0.1667		0.3295
16.115		0.575		0.053		-0.3154
16.11		0.518		-0.0379		-0.0107
16.105		0.254		-0.0068		-0.0239
16.1		0.132		-0.0015		0.1647
16.095		0.02		-0.0659		-0.3057
16.09		-0.029		-0.0111		0.138
16.085		-0.332		-0.0514		-0.0014
16.08		-0.058		-0.0539		0.0727
16.075		-0.552		-0.0129		0.2689
16.07		-1.381		-0.0433		0.8535
16.065		-1.502		-0.1342		0.5066
16.06		-1.58		-0.0022		0.1586
16.055		-1.883		-0.1785		0.4293
16.05		-2.134		-0.1659		0.7227
16.045		-2.353		-0.1241		0.6606
16.04		-2.629		-0.0632		0.6928
16.035		-2.074		-0.0623		0.7733
16.03		-2.519		-0.1233		0.5391
16.025		-2.382		0.0338		0.4328
16.02		-2.062		-0.0983		0.6945
16.015		-2.837		-0.2366		0.9136
16.01		-2.06		-0.2098		0.835
16.005		-3.028		-0.0434		0.8892
16		-2.571		0.058		0.7847
15.995		-2.281		-0.0705		0.454
15.99		-2.307		-0.1432		0.4993
15.985		-2.888		0.0184		0.9172
15.98		-2.518		-0.1506		1.3519
15.975		-2.987		-0.1182		1.0456
15.97		-2.805		-0.0635		0.8421
15.965		-2.321		0.0157		0.2051
15.96		-2.553		0.0762		0.8428
15.955		-2.989		-0.0397		1.0195
15.95		-2.546		0.1319		0.6446
15.945		-2.757		-0.0763		0.6738
15.94		-2.764		0.0212		0.3484
15.935		-2.587		0.0322		0.2462
15.93		-2.162		0.0234		0.7476
15.925		-2.638		0.0105		0.3027
15.92		-3.014		-0.1994		0.9877
15.915		-2.271		0.157		-0.1387
15.91		-3.068		-0.0435		0.2394
15.905		-2.503		0.0767		0.4355
15.9		-3.081		-0.0619		1.1106
15.895		-2.707		-0.045		1.0305
15.89		-2.073		-0.0741		0.7293
15.885		-1.923		-0.0172		0.5471
15.88		-1.789		0.048		0.3002
15.875		-1.614		0.0272		-0.006
15.87		-1.454		0.1109		-0.1853
15.865		-1.8		-0.0165		0.3008
15.86		-1.208		-0.27		0.6896
15.855		-1.653		0.0643		0.4261
15.85		-1.478		0.1092		-0.1363
15.845		-1.142		-0.0493		0.2244
15.84		-0.699		0.0566		0.6576
15.835		-0.735		-0.1566		0.1726
15.83		-0.925		0.1262		0.0052
15.825		-0.887		0.1266		0.1045
15.82		-0.597		0.016		0.3968
15.815		-1.099		0.1015		-0.041
15.81		-0.705		-0.0663		0.5707
15.805		-0.663		0.0304		0.5092
15.8		-0.47		-0.0239		-0.0669

## Sheet: TS_PRECT__d18O_Ostolo
Model Year (start time at 16.2 ka)		Surface Temperature anomaly relative to 16.2 ka (Celsius)		Total Precipitation anomaly relative to 16.2 ka (m/year)		d18O speleo anomaly (based on precipitation and temperature) (permil) relative to 16.2 ka
16.195		0		0		0
16.19		0.07		-0.0914		0.2525
16.185		0.055		-0.0827		0.2246
16.18		0.07		-0.073		0.1758
16.175		0.087		-0.018		0.1972
16.17		0.222		-0.0449		0.2335
16.165		0.09		0.005		0.0187
16.16		0.009		-0.0474		0.233
16.155		0.061		-0.0194		0.136
16.15		-0.018		-0.0719		0.244
16.145		-0.011		-0.0459		0.2276
16.14		-0.238		0.0467		0.1717
16.135		0.01		-0.0468		0.1042
16.13		-0.071		0.031		0.1333
16.125		-0.044		-0.1006		0.3315
16.12		0.08		-0.0516		0.1537
16.115		0.126		-0.0096		0.1138
16.11		-0.04		0		0.1471
16.105		0.289		0.0003		0.0774
16.1		-0.032		-0.0518		0.2793
16.095		0.141		-0.0435		0.2022
16.09		0.232		0.0113		-0.1036
16.085		-0.225		-0.091		-0.096
16.08		-0.118		-0.1512		-0.1541
16.075		-0.092		-0.223		-0.3072
16.07		-0.294		-0.2503		-0.8894
16.065		-0.306		-0.198		-0.7359
16.06		-0.522		-0.301		-0.5564
16.055		-0.636		-0.258		-1.0194
16.05		-0.454		-0.2162		-0.9052
16.045		-0.713		-0.3184		-1.1024
16.04		-0.893		-0.3086		-0.8821
16.035		-0.603		-0.3339		-1.028
16.03		-0.748		-0.3436		-1.0468
16.025		-0.723		-0.3216		-1.2708
16.02		-0.394		-0.277		-1.5519
16.015		-0.895		-0.2999		-1.422
16.01		-0.78		-0.3329		-1.1866
16.005		-0.961		-0.2849		-1.4352
16		-0.862		-0.3021		-1.6563
15.995		-0.431		-0.2947		-1.3347
15.99		-0.762		-0.3047		-1.2445
15.985		-0.809		-0.2902		-1.4856
15.98		-0.574		-0.333		-1.4052
15.975		-0.778		-0.2863		-1.354
15.97		-0.677		-0.3305		-1.3874
15.965		-0.51		-0.3296		-1.4605
15.96		-0.528		-0.3476		-1.6365
15.955		-0.715		-0.3496		-1.5373
15.95		-0.718		-0.3151		-1.6446
15.945		-0.773		-0.2925		-1.6203
15.94		-0.509		-0.3168		-1.4446
15.935		-0.732		-0.3582		-1.598
15.93		-0.475		-0.2906		-1.7606
15.925		-0.709		-0.3244		-1.6691
15.92		-0.805		-0.2928		-1.6973
15.915		-0.615		-0.2806		-1.4696
15.91		-0.769		-0.3268		-1.6179
15.905		-0.671		-0.3449		-1.7033
15.9		-0.722		-0.359		-1.7544
15.895		-0.714		-0.3278		-1.8451
15.89		-0.653		-0.2647		-1.4543
15.885		-0.646		-0.2894		-1.343
15.88		-0.334		-0.229		-1.0465
15.875		-0.191		-0.2646		-0.9505
15.87		-0.148		-0.13		-1.1566
15.865		-0.187		-0.2913		-0.7445
15.86		-0.522		-0.2884		-0.9071
15.855		-0.335		-0.2406		-1.0673
15.85		-0.128		-0.2906		-0.7617
15.845		-0.123		-0.2155		-1.067
15.84		-0.4		-0.2211		-0.6969
15.835		-0.169		-0.2413		-0.6167
15.83		-0.197		-0.2073		-0.4837
15.825		0.018		-0.2163		-0.7202
15.82		-0.125		-0.2141		-0.7825
15.815		-0.166		-0.1793		-0.413
15.81		-0.067		-0.1482		-0.5142
15.805		-0.044		-0.1408		-0.3309
15.8		0.08		-0.2002		-0.0993

## Sheet: TS_PRECT_d18O_Paixao
Model Year (start time at 16.2 ka)		Surface Temperature anomaly relative to 16.2 ka (Celsius)		Total Precipitation anomaly relative to 16.2 ka (m/year)		d18O speleo anomaly (based on precipitation and temperature) (permil) relative to 16.2 ka
16.195		0		0		0
16.19		-0.028		-0.0229		-0.2113
16.185		0.268		0.1547		0.0166
16.18		0.315		0.324		-0.6037
16.175		0.082		0.0505		0.1283
16.17		0.484		0.4883		-1.0316
16.165		0.306		0.1582		-0.5646
16.16		0.085		0.0713		-0.3232
16.155		0.17		0.0973		-0.182
16.15		-0.106		-0.1364		0.315
16.145		-0.142		-0.0904		-0.0434
16.14		-0.014		0.1173		-0.1447
16.135		-0.057		-0.1797		0.2761
16.13		0.311		0.3218		-0.4375
16.125		0.112		0.1956		-0.4265
16.12		-0.243		-0.326		0.6823
16.115		0.237		0.2841		-0.4827
16.11		0.239		0.3991		-0.7692
16.105		0.342		0.0736		-0.0745
16.1		0.027		0.0151		-0.3709
16.095		0.259		0.1148		-0.2985
16.09		0.375		0.3061		-0.4826
16.085		0.107		0.314		-0.6945
16.08		0.219		0.1719		-0.2439
16.075		-0.049		0.1535		-0.4377
16.07		-0.158		0.031		0.4464
16.065		-0.043		0.2706		-0.6664
16.06		-0.387		0.0734		0.0439
16.055		-0.364		0.0031		0.0545
16.05		-0.075		0.2614		-0.6063
16.045		-0.262		0.171		-0.3775
16.04		-0.168		0.2778		-0.517
16.035		-0.124		0.3626		-0.5147
16.03		-0.079		0.3767		-0.475
16.025		0.076		0.7799		-1.2611
16.02		-0.372		0.0939		0.3052
16.015		-0.095		0.4		-0.4126
16.01		-0.263		0.1997		-0.4473
16.005		-0.533		0.1904		0.1489
16		-0.307		0.3338		-0.5049
15.995		0.132		0.5998		-1.1101
15.99		0.213		0.6262		-1.0082
15.985		-0.444		0.1257		-0.0059
15.98		-0.238		0.1984		-0.1225
15.975		0.07		0.4233		-0.6708
15.97		-0.172		0.4075		-0.3511
15.965		0.108		0.6522		-1.1128
15.96		0.147		0.5452		-0.7569
15.955		0.043		0.334		-0.3311
15.95		0.067		0.7104		-1.0058
15.945		-0.056		0.4632		-0.8401
15.94		0.183		0.5753		-0.9739
15.935		-0.028		0.5869		-0.9659
15.93		-0.105		0.245		-0.4271
15.925		0.263		0.8663		-1.2926
15.92		-0.187		0.464		-0.6613
15.915		0.309		0.816		-1.4471
15.91		0.112		0.5915		-0.7291
15.905		0.136		0.6254		-1.1001
15.9		-0.09		0.3985		-0.4692
15.895		-0.276		0.3009		-0.3502
15.89		-0.023		0.1781		-0.3691
15.885		-0.189		0.2583		-0.3828
15.88		0.353		0.5091		-0.8584
15.875		0.374		0.5234		-0.8198
15.87		0.375		0.4172		-0.7159
15.865		0.04		0.1813		-0.2084
15.86		-0.038		0.0537		0.1071
15.855		0.033		0.1497		-0.2736
15.85		0.18		0.3394		-0.4378
15.845		0.281		0.2716		-0.6407
15.84		-0.454		-0.0917		0.4625
15.835		0.199		0.2499		-0.2621
15.83		0.19		0.1573		-0.1864
15.825		0.201		0.1532		-0.4241
15.82		0.163		0.3491		-0.4378
15.815		0.074		0.2741		-0.5965
15.81		-0.102		-0.0958		0.1262
15.805		0.259		0.2792		-0.4771
15.8		0.048		-0.0198		0.1003
